# Supplementary material for: A proposito di *parwār / parbār
Source: Royal Society of Chemistry journal article supplement (doi:10.1039/c9an01692a), 1996-01-01
Supplement: c9an01692a1.pdf [file c9an01692a1.pdf]

Supporting Information

**Efficient enantiorecognition of amino acids under a stimuli-responsive system: Synthesis, characterization and application of electroactive rotaxane**

Datong Wu,<sup>a</sup> Fei Pan,<sup>a</sup> Gao-Chao Fan,<sup>b</sup> Ziming Zhu,<sup>c</sup> Li Gao,<sup>a</sup> Yongxin Tao<sup>a</sup> and

Yong Kong<sup>\*a</sup>

*<sup>a</sup>Jiangsu Key Laboratory of Advanced Materials and Technology, School of Petrochemical Engineering, Changzhou University, Changzhou 213164, China.*

*\*Email: yzkongyong@cczu.edu.cn*

*<sup>b</sup>Key Laboratory of Optic-electric Sensing and Analytical Chemistry for Life Science, MOE, Shandong Key Laboratory of Biochemical Analysis, Qingdao University of Science and Technology, Qingdao 266042, China*

*<sup>c</sup>College of Life Science and Technology, China Pharmaceutical University, Nanjing 211198, China*

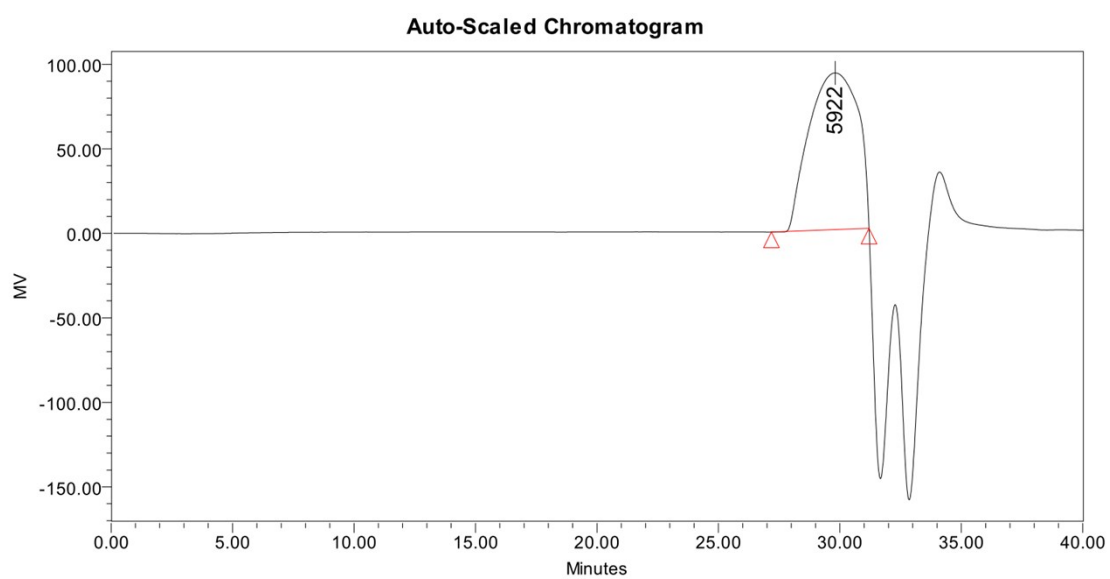

**GPC Results**

|   | Dist Name | Mn   | Mw   | MP   | Mz   | Mz+1 | Mv | Polydispersity | % Area |
|---|-----------|------|------|------|------|------|----|----------------|--------|
| 1 |           | 5780 | 6481 | 5922 | 7239 | 7982 |    | 1.121290       | 100.00 |

**Fig. S1.** GPC results of polymer-2.
